# Supplementary material for: Mathematical Modeling Finds Disparate Interferon Production Rates Drive Strain-Specific Immunodynamics during Deadly Influenza Infection
Source: MDPI journal article supplement (doi:10.3390/v14050906), 2022-04-27
Supplement: s1 [file s1]

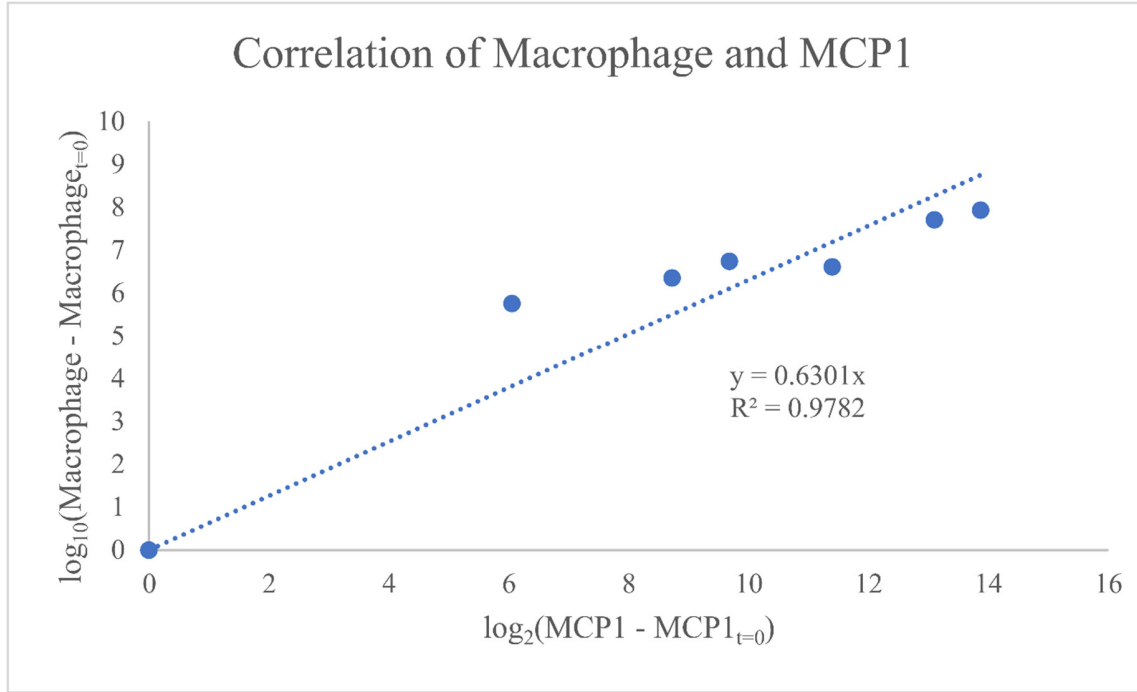

**Figure S1.** Macrophage and MCP1 correlation.  $\log_{10}$  of macrophage cell count in the lung is highly correlated with the  $\log_2$  of MCP1 gene expression. This regression is used to translate between MCP1 and Macrophage states.

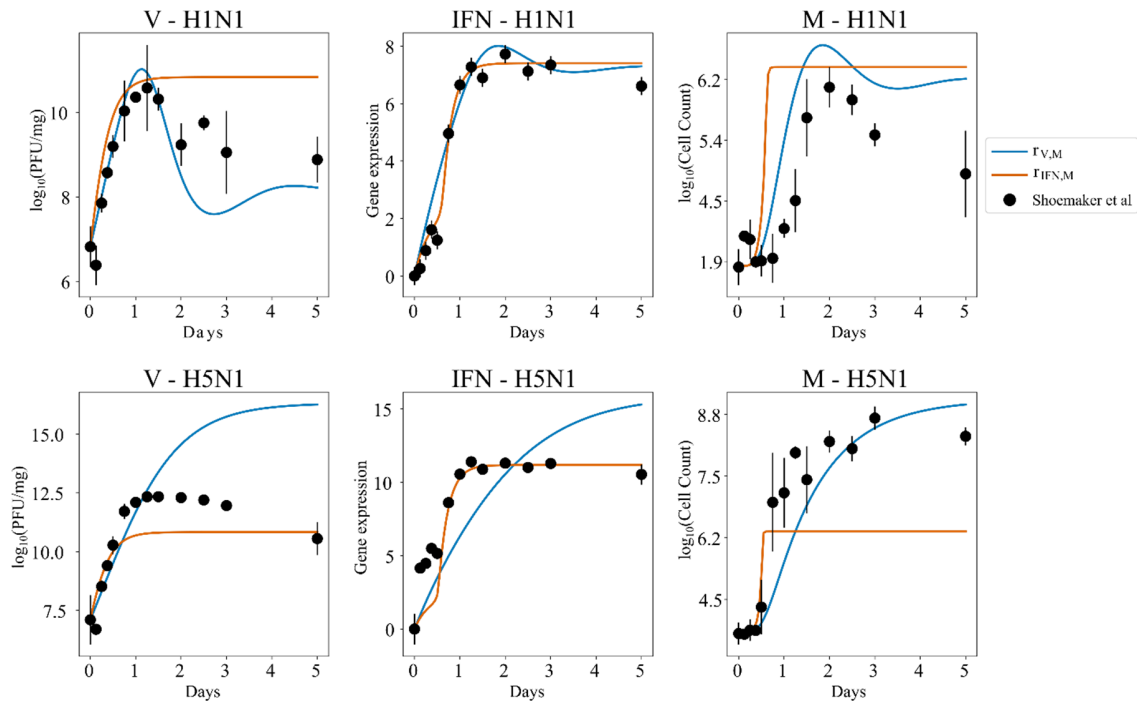

**Figure S2.** Models 2 and 3 predictions. Macrophage-dependent feedback mechanisms (Models 2 and 3 NSSD) exhibit worse fits than a model structure without these mechanisms (Model 4). Macrophage-based clearance of Virus ( $r_{V,M}$ , blue line) fits

H5N1 data poorly. Data from Shoemaker et al [1] are shown with the standard error associated with triplicate data points per timepoint.

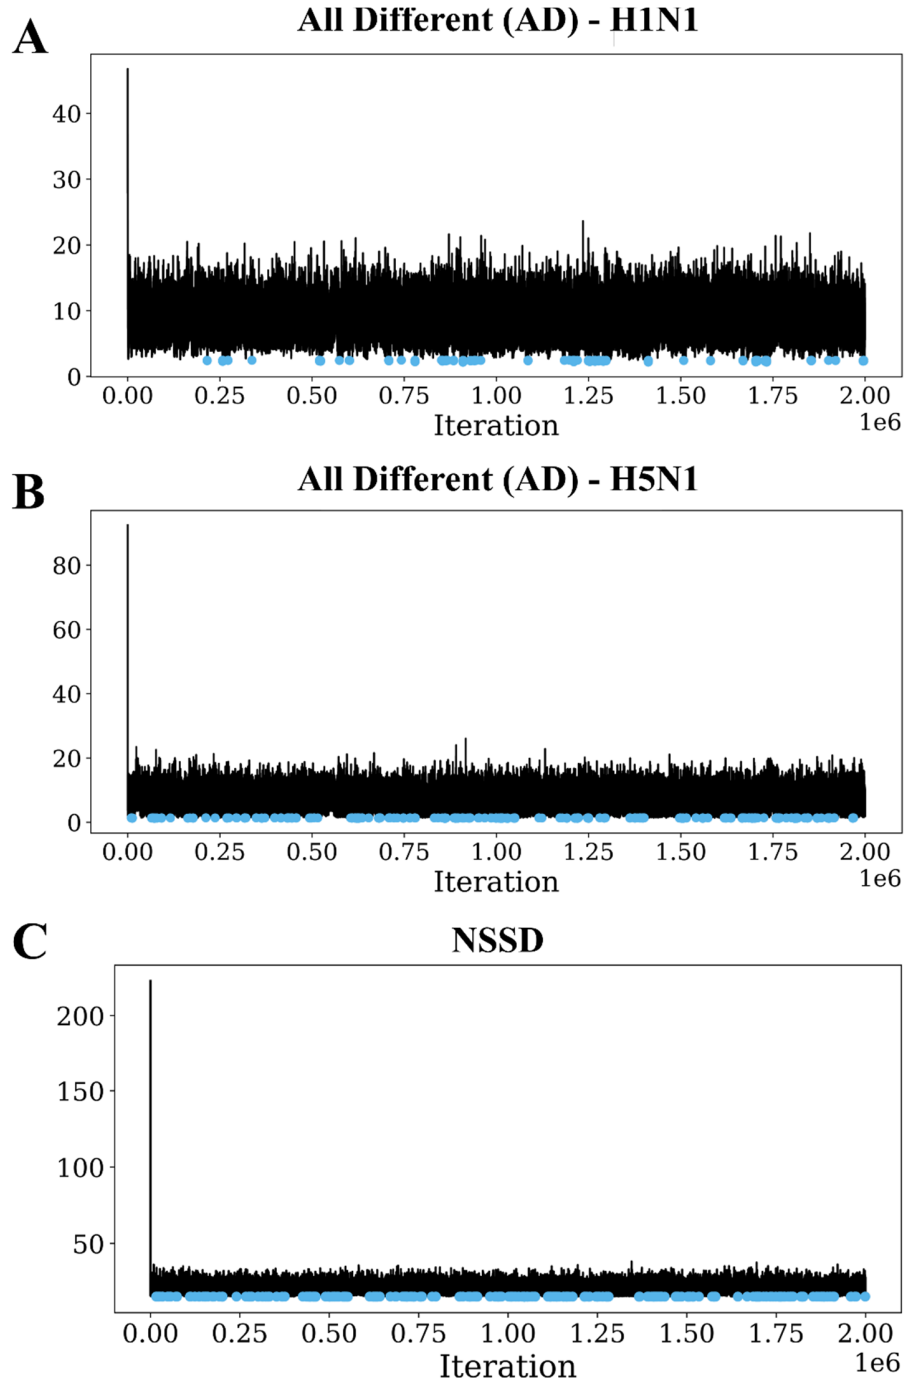

**Figure S3.** AD and NSSD model 4 energy plots. MCMC quickly completes burn-in and thoroughly explored parameter space for all three scenarios.

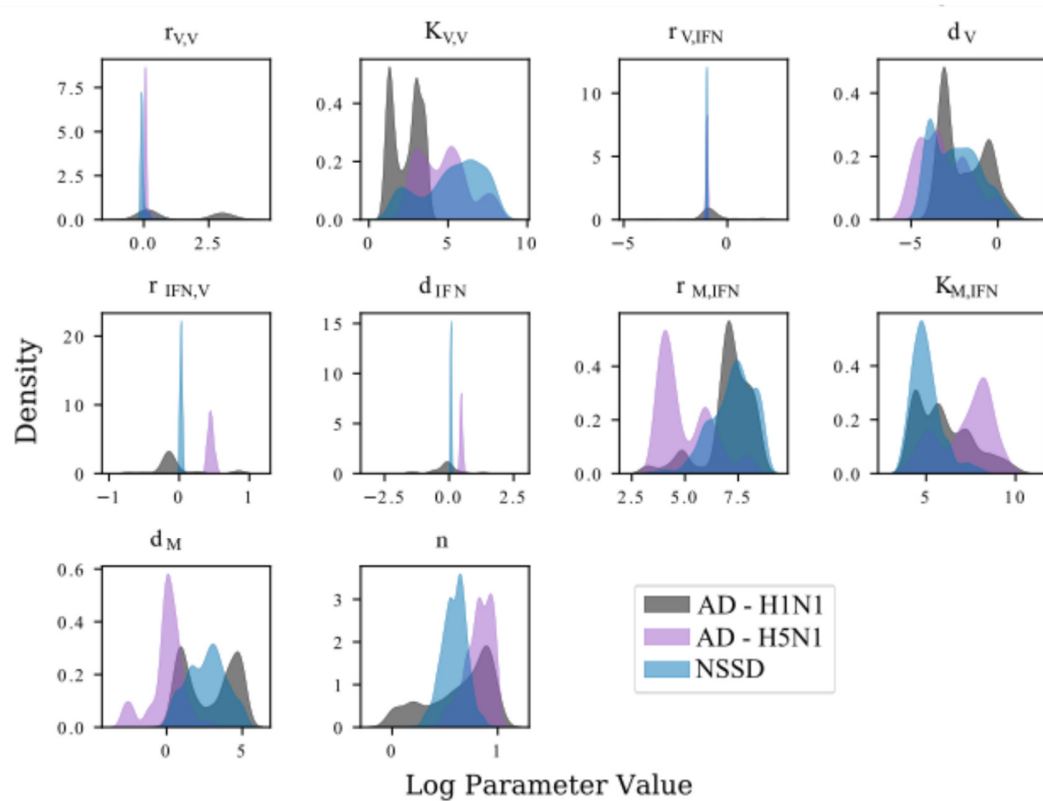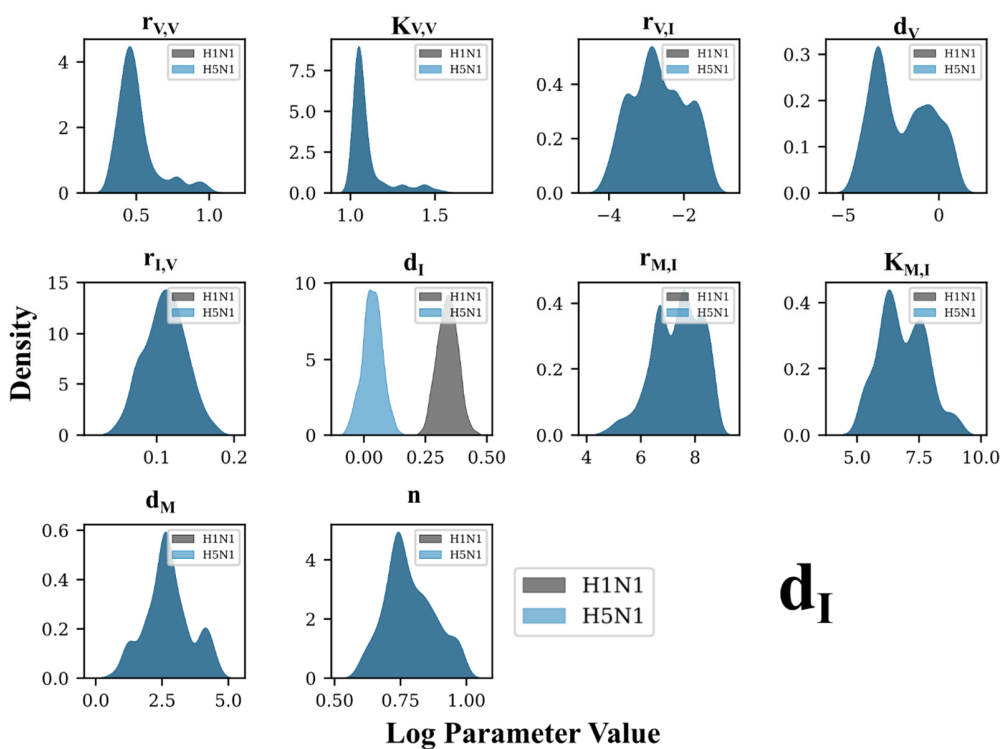

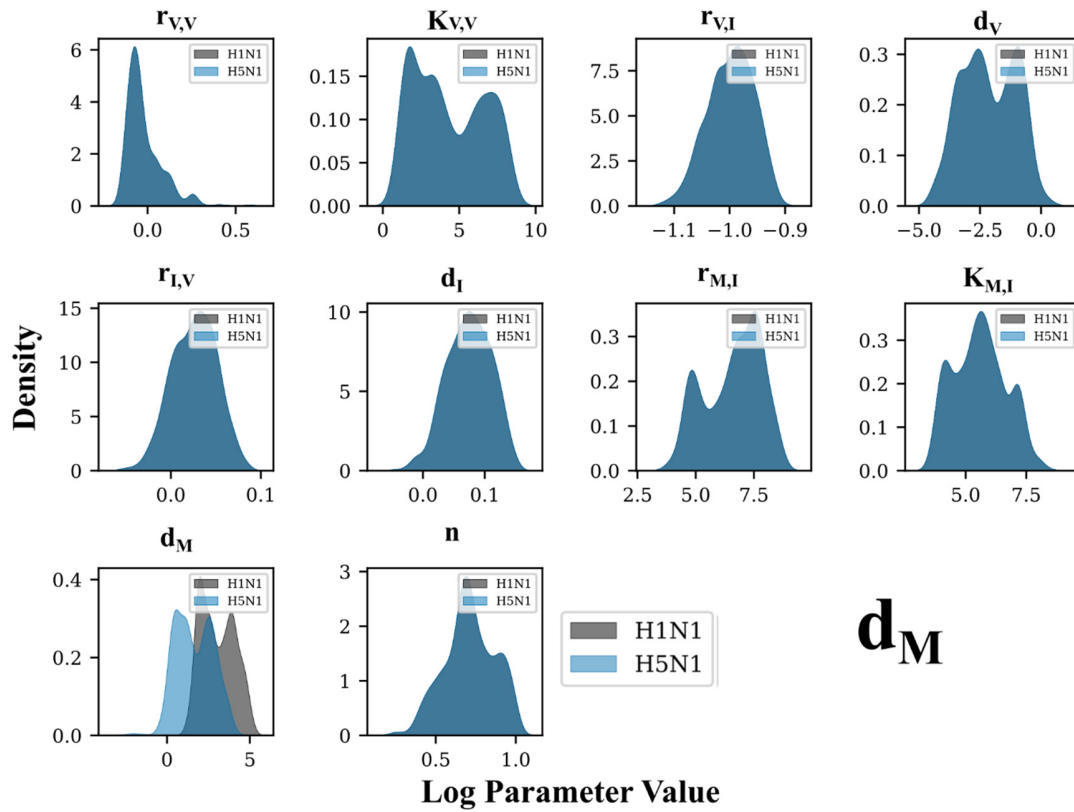

$d_m$

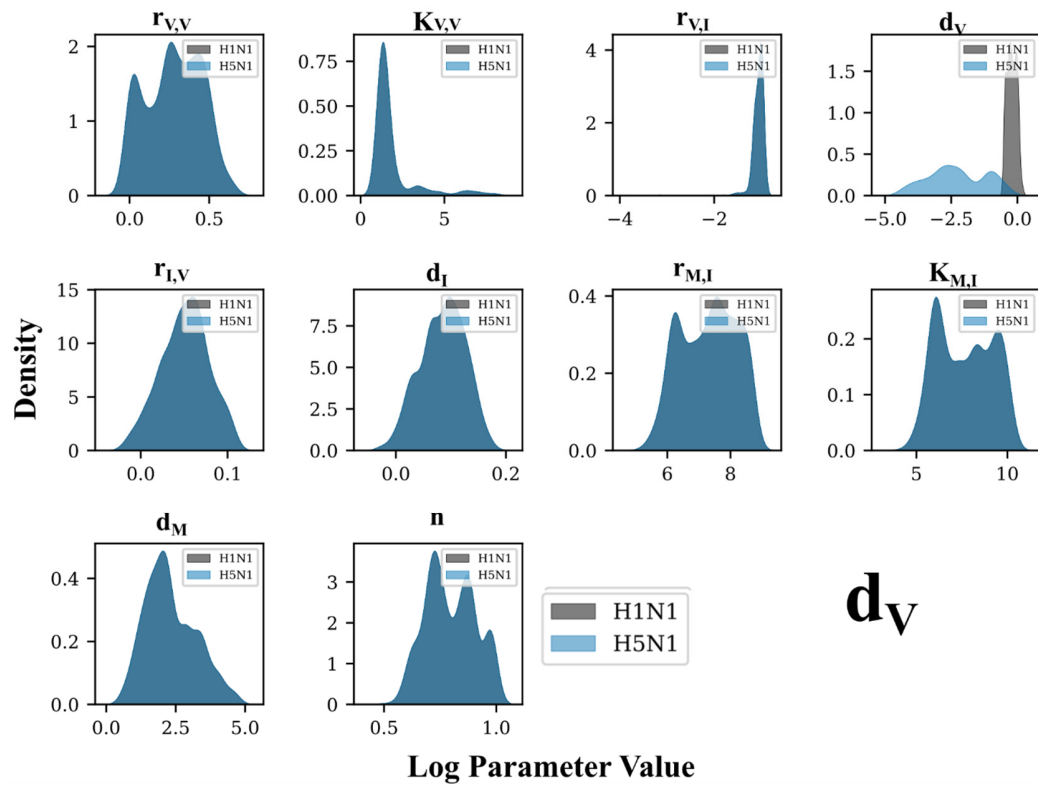

$d_v$

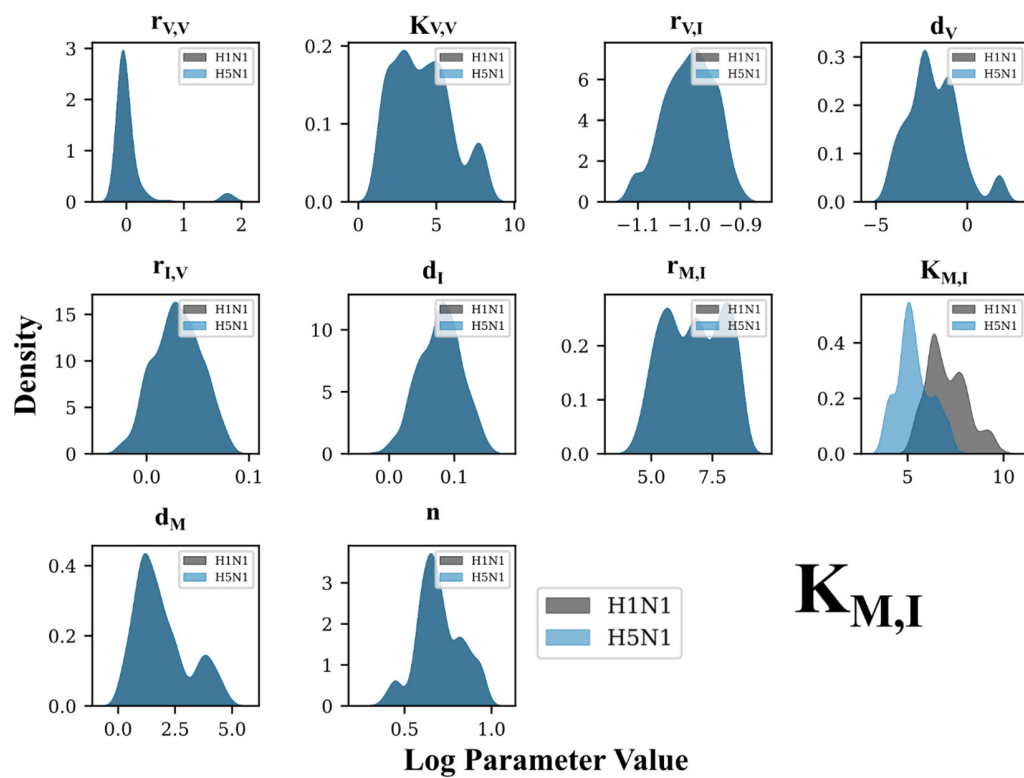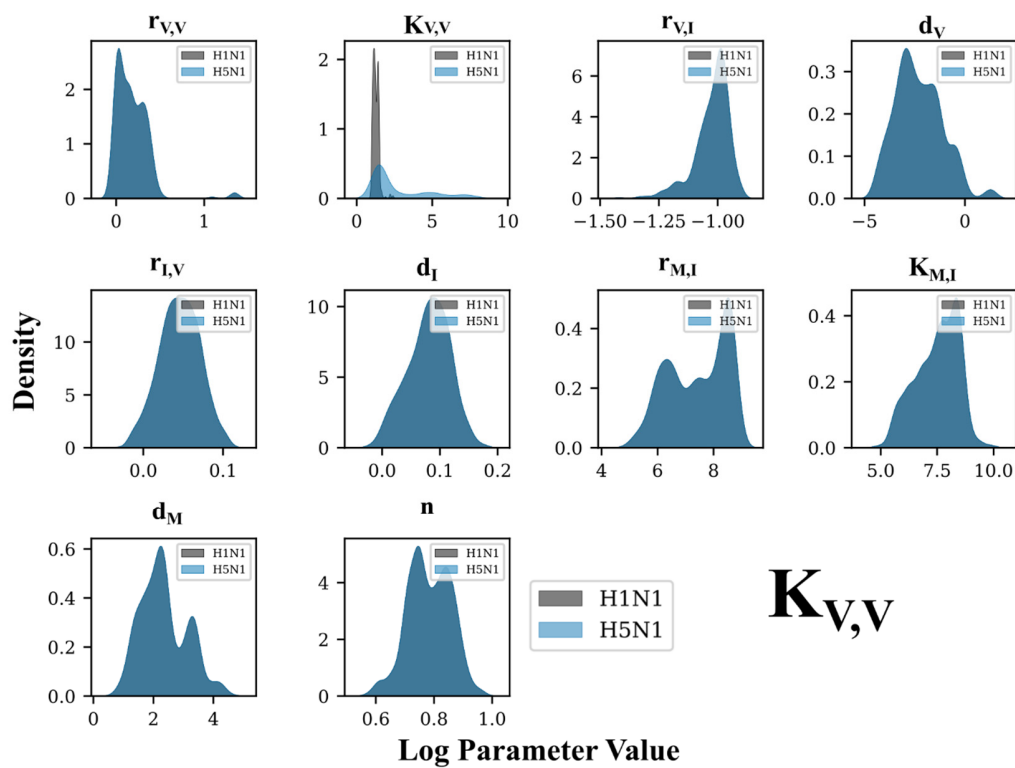

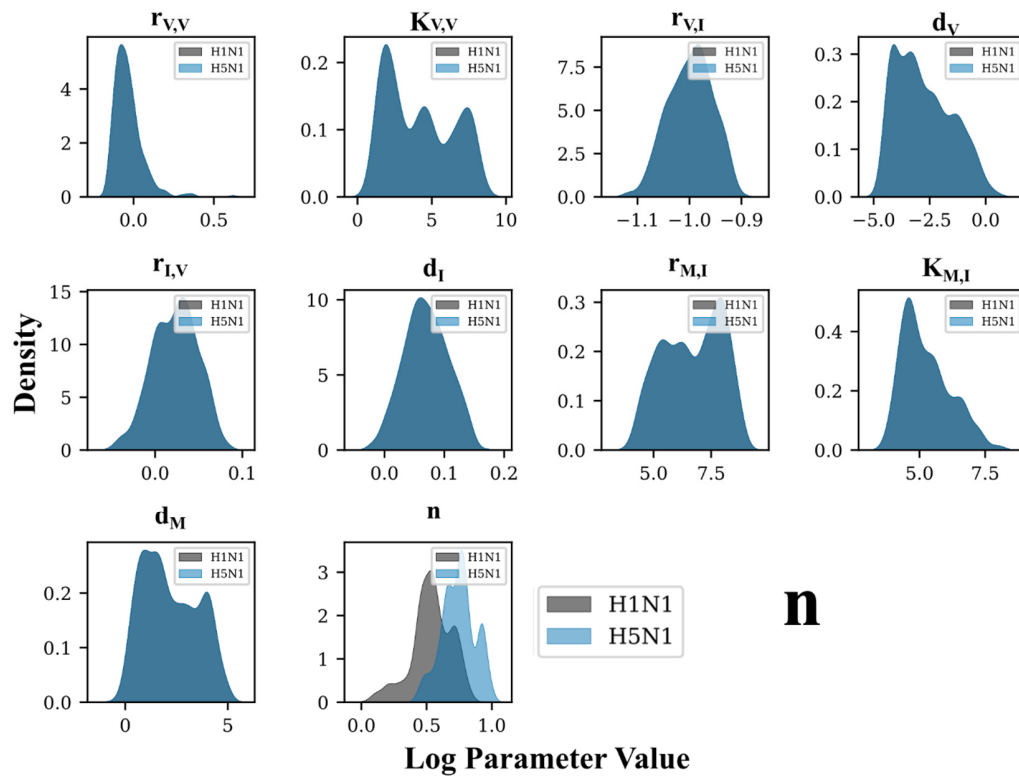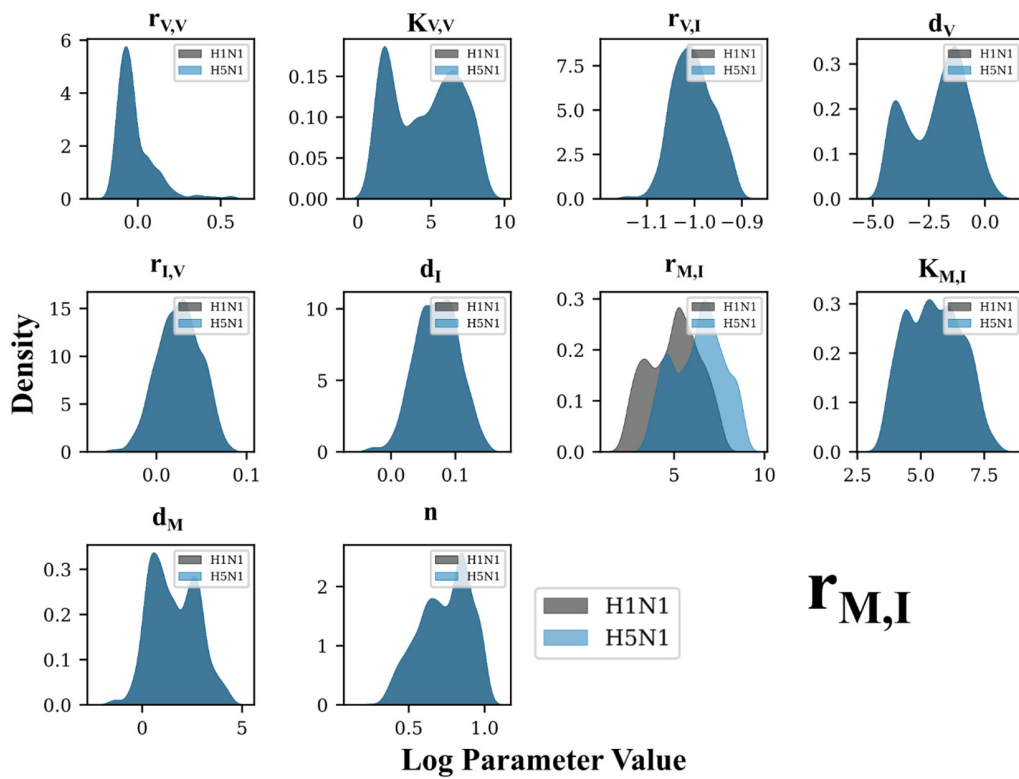

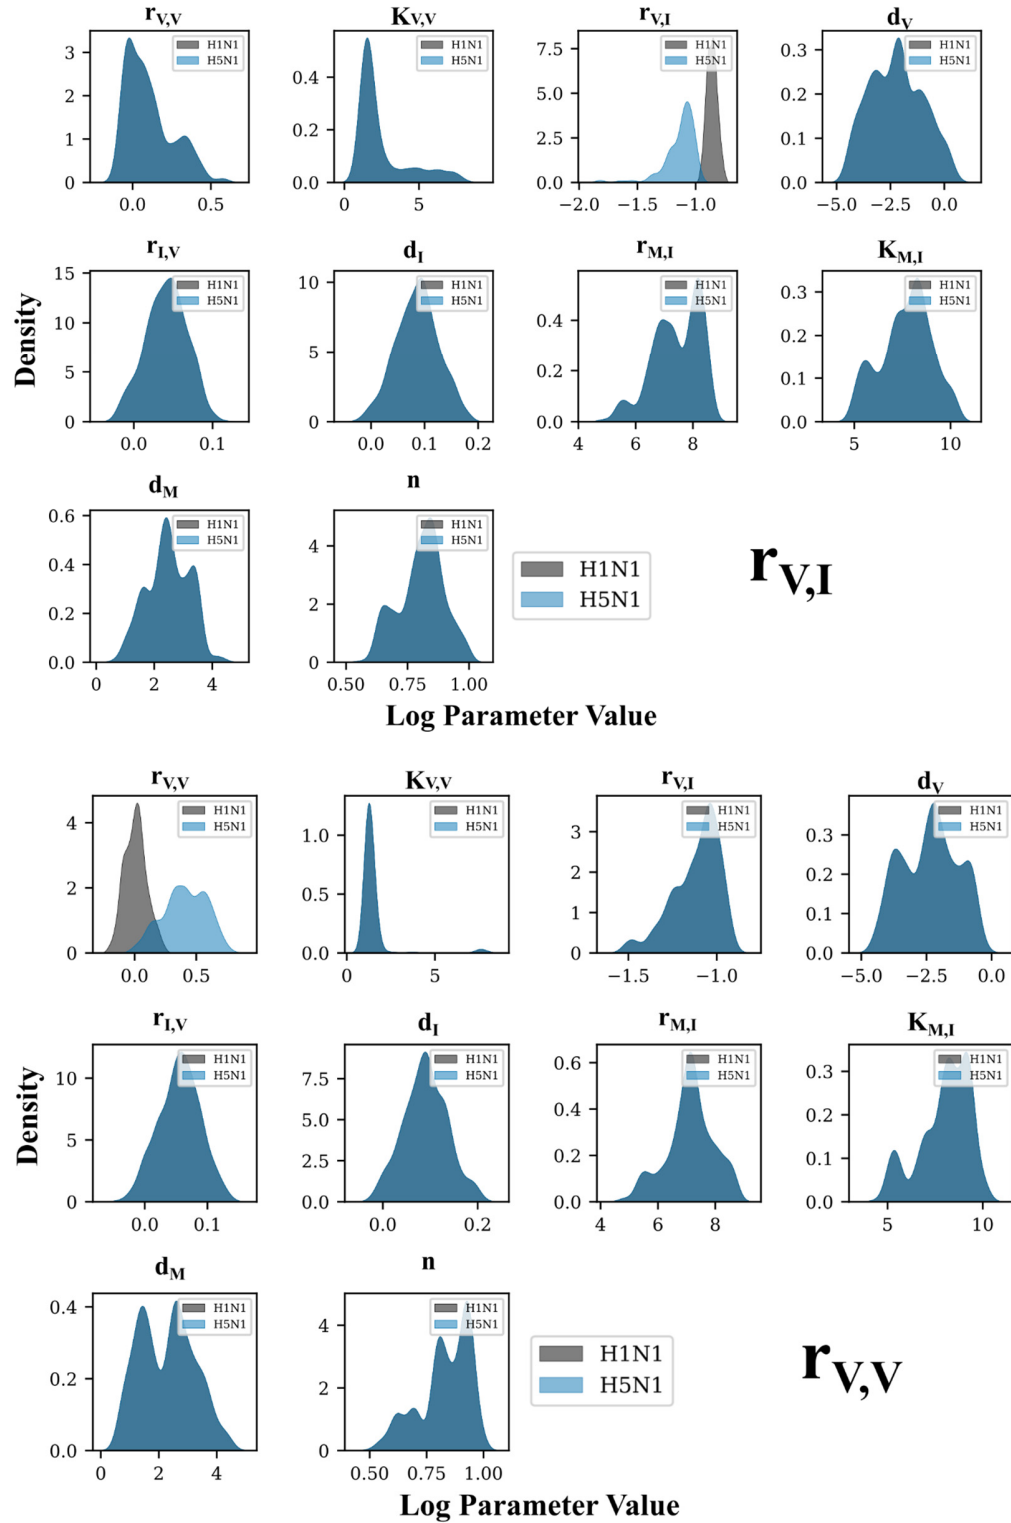

**Figure S4.** AD, NSSD, and OSSD model 4 parameter posterior density distributions. Overlapping distributions with an OSSD parameter ( $r_{M,I}$ , etc.) likely indicate non strain-specific mechanisms are likely, while distinct distributions ( $d_I$ , etc.) likely indicate strain-specific differences exist.
